# Supplementary material for: Use of Mental Health Services by Youths and Young Adults Before and During Correctional Custody: A Population-Based Study
Source: Atypon-hosted journal article supplement (doi:10.1176/appi.ps.201500085), 2016-02-01
Supplement: appi.ps.201500085.ds001.pdf [file appi.ps.201500085.ds001.pdf]

## APPENDIX

*Appendix Table 1: Health administrative data definitions for mental health services use*

| Type of health contact        | Database   | Definition                                                                                                                                                                                       | Diagnostic codes (ICD-9 / ICD-10)                      |
|-------------------------------|------------|--------------------------------------------------------------------------------------------------------------------------------------------------------------------------------------------------|--------------------------------------------------------|
| Physician visits <sup>1</sup> | OHIP       | Any record with:<br>1) a MH/A-related procedure code ( <i>feecode</i> );<br>or<br>2) a MH/A-related diagnostic code ( <i>dxcode</i> );<br>or<br>3) a psychiatrist specialty code ( <i>spec</i> ) | 295-298, 300-304, 306, 309, 311, 897-902, 904-906, 909 |
| Emergency department visits   | CIHI-NACRS | Any record with an MH/A or self-harm related diagnostic code                                                                                                                                     | MH/A: F00-F99<br>Self-harm: X60-X84                    |
| Hospitalizations              | CIHI-DAD   | Any record with an MH/A related diagnostic code                                                                                                                                                  | F00-F99                                                |
|                               | OMHRS      | Any record                                                                                                                                                                                       | All codes                                              |

<sup>1</sup> Steele, 2004

OHIP: Ontario Health Insurance Plan

CIHI-NACRS: Canadian Institute for Health Information National Ambulatory Care Reporting System

CIHI-DAD: Canadian Institute for Health Information Discharge Abstract Database

OMHRS: Ontario Mental Health Reporting System

ICD: International Classification of Diseases

MH/A: Mental health/addictions

*Appendix Table 2: Demographic profile of youths and young adults with mental health services use in Ontario correctional centres, April 1, 2010 to March 31, 2012*

| Variable                                         | Youths/young adults with any physician visit in corrections |      | Youths/young adults with a mental health physician visit in corrections |      | Proportion of youths/young adults in corrections with a mental health visit |
|--------------------------------------------------|-------------------------------------------------------------|------|-------------------------------------------------------------------------|------|-----------------------------------------------------------------------------|
|                                                  | N <sup>1</sup>                                              | %    | N <sup>1</sup>                                                          | %    |                                                                             |
| <b>Total</b>                                     | 13,919                                                      | 100  | 5823                                                                    | 100  | 41.8                                                                        |
| <b>Sex</b>                                       |                                                             |      |                                                                         |      |                                                                             |
| Male                                             | 10,515                                                      | 75.5 | 5102                                                                    | 87.6 | 48.5                                                                        |
| Female                                           | 3,404                                                       | 24.5 | 721                                                                     | 12.4 | 21.2                                                                        |
| <b>Age group</b>                                 |                                                             |      |                                                                         |      |                                                                             |
| 12-17                                            | 2,454                                                       | 17.6 | 306                                                                     | 5.3  | 12.5                                                                        |
| 18-24                                            | 11,465                                                      | 82.4 | 5517                                                                    | 94.7 | 48.1                                                                        |
| <b>Rural residence<sup>2</sup></b>               |                                                             |      |                                                                         |      |                                                                             |
| No                                               | 12,590                                                      | 90.5 | 5065                                                                    | 87.0 | 40.2                                                                        |
| Yes                                              | 1,318                                                       | 9.5  | 755                                                                     | 13.0 | 57.3                                                                        |
| <b>Neighbourhood income quintile<sup>3</sup></b> |                                                             |      |                                                                         |      |                                                                             |
| 1 (lowest)                                       | 4,282                                                       | 30.8 | 2271                                                                    | 39.0 | 53.0                                                                        |

|             |       |      |      |      |      |
|-------------|-------|------|------|------|------|
| 2           | 2,917 | 21.0 | 1204 | 20.7 | 41.3 |
| 3           | 3,029 | 21.8 | 953  | 16.4 | 31.5 |
| 4           | 2,113 | 15.2 | 776  | 13.3 | 36.7 |
| 5 (highest) | 1,424 | 10.2 | 539  | 9.3  | 37.8 |
|             |       |      |      |      |      |

<sup>1</sup> Values may not add up to total N due to missing information

<sup>2</sup> Based on the Statistics Canada definition of rurality, where Census Metropolitan Areas that have a population of less than 10,000 are considered to be rural (du Plessis V, Beshiri R, Bollman RD, Clemenson H. Definitions of "Rural". 2002. Ottawa, ON, Statistics Canada)

<sup>3</sup> Estimated using income quintiles from neighbourhood postal code data in the RPDB and 2006 Statistics Canada Census Area Profiles data. Statistics Canada classifies Canadian neighbourhoods into one of five quintiles, ranked from poorest (quintile 1) to wealthiest (quintile 5) (Wilkins R. PCCF+ Version 5E User's Guide. 2009. Ottawa, ON, Statistics Canada)

*Appendix Table 3: Primary mental health diagnoses of youths and young adults with mental health services use in Ontario correctional centres (N = 5823) between April 1, 2010 and March 31, 2012*

| <b>Variable</b>                                             | <b>Schizophrenia<sup>1</sup></b> |      | <b>Mood disorder</b> |      | <b>Drug use</b> |      | <b>Anxiety disorder</b> |      | <b>Other MH</b> |      |
|-------------------------------------------------------------|----------------------------------|------|----------------------|------|-----------------|------|-------------------------|------|-----------------|------|
|                                                             | <i>N</i>                         | %    | <i>N</i>             | %    | <i>N</i>        | %    | <i>N</i>                | %    | <i>N</i>        | %    |
| <b>N(%) with correctional MH/A services use<sup>2</sup></b> | 507                              | 8.7  | 729                  | 12.5 | 1225            | 21.0 | 2856                    | 49.0 | 506             | 8.7  |
| <b>Sex<sup>2</sup></b>                                      |                                  |      |                      |      |                 |      |                         |      |                 |      |
| Male                                                        | 483                              | 95.2 | 664                  | 91.1 | 946             | 77.2 | 324                     | 89.7 | 477             | 94.3 |
| Female                                                      | 24                               | 4.7  | 65                   | 8.9  | 279             | 22.8 | 2532                    | 11.3 | 29              | 5.7  |
| <b>Age<sup>2</sup></b>                                      |                                  |      |                      |      |                 |      |                         |      |                 |      |
| 12-17                                                       | *                                | *    | 61                   | 8.3  | 38              | 3.1  | 135                     | 4.7  | 67              | 13.2 |
| 18-24                                                       | *                                | *    | 668                  | 91.6 | 1187            | 96.9 | 2721                    | 95.3 | 439             | 86.8 |

<sup>1</sup>All diagnostic categories are hierarchical and mutually exclusive

<sup>2</sup> N(%) of each diagnostic column

MH/A: Mental health/addictions

\*Suppressed for confidentiality purposes due to small cell counts in the 12-17 age group

*Appendix Figure 1 – Schematic to define first-time correctional centre patients with mental health services use and their pre-correctional mental health treatment (1 year and 5 years prior to correctional entry)*

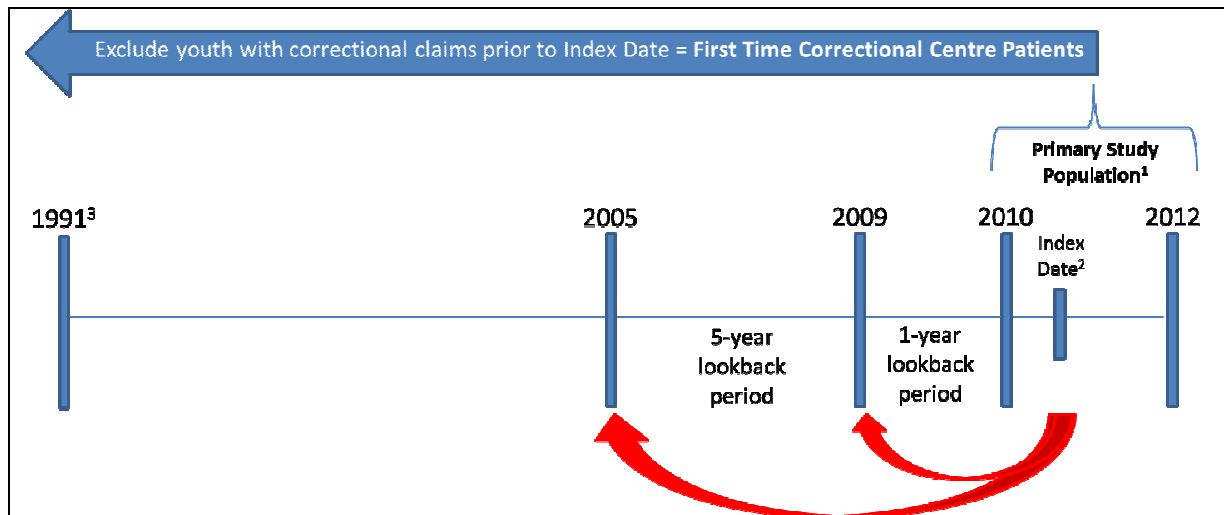

<sup>1</sup> Individuals who had at least one mental health-specific physician visit in correctional custody between April 1, 2010 and March 31, 2012 (the correctional study period)

<sup>2</sup> For each individual in the primary study population, the earliest date of an OHIP claim during the correctional study period

<sup>3</sup> OHIP Claims Database available from 1991 onward

OHIP: Ontario Health Insurance Plan
